# Supplementary material for: Detection of Low-Frequency Mutations and Identification of Heat-Induced Artifactual Mutations Using Duplex Sequencing
Source: MDPI journal article supplement (doi:10.3390/ijms20010199), 2019-01-08
Supplement: s1 [file s1]

**Table S1.** Sequencing data yield of human breast immortalized cells. The average depth (number of nucleotides sequenced at each genome position) was calculated as the total number of nucleotides sequenced divided by the mitochondrial (mt) DNA size of 16569 bases.

**A. NGS and NGS (Q30<sup>r</sup>) data yield (Data used for Figures 1-4 and S1-S4)**

| Exp | Avg NGS depth | Total sequenced NGS Nts | NGS: No. of rare muts | NGS: Rare mut freq           | Avg NGS (Q30 <sup>r</sup> ) depth | Total sequenced NGS (Q30 <sup>r</sup> ) Nts | NGS (Q30 <sup>r</sup> ): No. of rare muts | NGS (Q30 <sup>r</sup> ): Rare mut freq |
|-----|---------------|-------------------------|-----------------------|------------------------------|-----------------------------------|---------------------------------------------|-------------------------------------------|----------------------------------------|
| #1  | 517           | 8558610                 | <b>9803</b>           | <b>1.15 x10<sup>-3</sup></b> | 109                               | 1810307                                     | <b>1131</b>                               | <b>6.25 x10<sup>-4</sup></b>           |
| #2  | 2130          | 35293720                | <b>45526</b>          | <b>1.29 x10<sup>-3</sup></b> | 138                               | 2279999                                     | <b>556</b>                                | <b>2.44 x10<sup>-4</sup></b>           |
| #3  | 210473        | 3487319586              | <b>2476099</b>        | <b>7.10 x10<sup>-4</sup></b> | 140                               | 2311906                                     | <b>2395</b>                               | <b>1.04 x10<sup>-3</sup></b>           |
| #4  | 458441        | 7595916093              | <b>8773866</b>        | <b>1.16 x10<sup>-3</sup></b> | 140                               | 2322756                                     | <b>2084</b>                               | <b>8.97 x10<sup>-4</sup></b>           |

**B. SSCS and DCS data yield (Data used for Figures 1-4 and S1-S4)**

| Exp | Avg SSCS depth | Total sequenced SSCS Nts | SSCS: No. of rare muts | SSCS: Rare mut freq          | Avg DCS depth | Total sequenced DCS Nts | DCS: No. of rare muts | DCS: Rare mut freq           |
|-----|----------------|--------------------------|------------------------|------------------------------|---------------|-------------------------|-----------------------|------------------------------|
| #3  | 2086           | 34562417                 | <b>3838</b>            | <b>1.11 x10<sup>-4</sup></b> | 444           | 7363685                 | <b>77</b>             | <b>1.05 x10<sup>-5</sup></b> |
| #4  | 40421          | 669733398                | <b>99361</b>           | <b>1.48 x10<sup>-4</sup></b> | 6803          | 112714571               | <b>1164</b>           | <b>1.03 x10<sup>-5</sup></b> |

Abbreviations used are: Avg, average; Nts, nucleotides; mut, mutation; freq, frequency

**Table S2.** Sequencing data yield for heated vs. control DNA of human breast normal cells (II).

| Cells                                  | Avg<br>SSCS<br>depth | Total<br>sequenced<br>SSCS Nts | <b>SSCS:<br/>No. of<br/>rare<br/>mut</b> s | <b>SSCS:<br/>Rare mut<br/>freq</b> | Avg<br>DCS<br>depth | Total<br>sequenced<br>DCS Nts | <b>DCS: No.<br/>of rare<br/>mut</b> s | <b>DCS: Rare<br/>mut freq</b> |
|----------------------------------------|----------------------|--------------------------------|--------------------------------------------|------------------------------------|---------------------|-------------------------------|---------------------------------------|-------------------------------|
| Control<br>(Data for Figs 5, 6)        | 12257                | 203078000                      | <b>9351</b>                                | <b>4.60 x10<sup>-5</sup></b>       | 2248                | 37240836                      | <b>577</b>                            | <b>1.55 x10<sup>-5</sup></b>  |
| Heated<br>(Data for Figs 5, 6, S5, S6) | 11622                | 192572847                      | <b>15429</b>                               | <b>8.01 x10<sup>-5</sup></b>       | 2510                | 41582269                      | <b>635</b>                            | <b>1.53 x10<sup>-5</sup></b>  |

Abbreviations used are: Avg, average; Nts, nucleotides; SSCS, single strand consensus sequences; DCS, duplex consensus sequences; mt, mitochondria; mut, mutation; freq, frequency

**Table S3.** Identical homoplasmic unique mutations detected using next-generation sequencing (NGS Q30'), SSCS, and DCS analyses in all independent experiments for mtDNA of human breast immortalized cells. The mutations are listed in the order of largest to smallest gene size. **Green** represents **T>C/A>G** mutations and **red** represents **C>T/G>A** mutations.

| Gene           | DNA mutation | Amino acid mutations | Mutation type |
|----------------|--------------|----------------------|---------------|
| MT-ND5         | G12372A      | Syn                  | Red           |
|                | A13117G      | I261V                | Green         |
| MT-RNR2        | A1811G       | Syn                  | Green         |
|                | A2706G       | N346D                | Green         |
| MT-CO1         | G6179A       | Syn                  | Red           |
|                | C6587T       | Syn                  | Red           |
|                | C7028T       | Syn                  | Red           |
| MT-ND4         | T11299C      | Syn                  | Green         |
|                | A11362G      | Syn                  | Green         |
|                | A11467G      | Syn                  | Green         |
|                | G11719A      | Syn                  | Red           |
| MT-CYB         | C14766T      | T7I                  | Red           |
|                | T14798C      | F18L                 | Green         |
|                | A15326G      | T194A                | Green         |
| MT-ND1         | A3480G       | Syn                  | Green         |
|                | A4769G       | Syn                  | Green         |
| MT-RNR1        | A750G        | N35D                 | Green         |
|                | T1189C       | I181T                | Green         |
|                | A1438G       | Ter264W              | Green         |
| MT-CO3         | T9698C       | Syn                  | Green         |
| MT-ATP6        | T8632C       | Y36H                 | Green         |
|                | G9055A       | A177T                | Red           |
| MT-ND6         | C14167T      | Syn                  | Red           |
| MT-ND3         | A10398G      | T114A                | Green         |
| MT-ND4L        | A10550G      | Syn                  | Green         |
| MT-TL2         | A12308G      | K15E                 | Green         |
| MT-TD          | A7559G       | Syn                  | Green         |
| Non-coding RNA | A73G         |                      | Green         |
|                | A263G        |                      | Green         |
|                | C497T        |                      | Green         |
|                | T16093C      |                      | Red           |
|                | T16224C      |                      | Green         |
|                | T16311C      |                      | Green         |
|                | G16390A      |                      | Green         |
|                | T16519C      |                      | Red           |

**Table S4.** Significant differences in mutation context counts between heated vs. control DNA of human breast normal cells determined using SSCS analysis. Significant *p* values are denoted with \* (<0.05), \*\* (<5x10<sup>-4</sup>), and \*\*\* (<5x10<sup>-5</sup>) by the Chi-square test.

| C>A    | C>G     | C>T    | T>A     | T>C   | T>G |
|--------|---------|--------|---------|-------|-----|
| ACA *  | CCA *** | ACT *  | ATC *   | ATT * |     |
| ACC *  | CCC *** | CCT ** | ATG *   | GTC * |     |
| ACT ** | CCG *   | TCG *  | ATT *   | GTG * |     |
| CCA *  | CCT **  |        | CTA *   | TTA * |     |
| CCG *  | GCA *   |        | CTC *   | TTT * |     |
| GCT *  | TCA *** |        | GTA *** |       |     |
|        | TCC *** |        | TTA *** |       |     |

**Table S5.** Sequencing data yield of human breast normal cells (I and II).

| Cells                           | Avg<br>SSCS<br>depth | Total<br>sequenced<br>SSCS Nts | <b>SSCS:<br/>No. of<br/>rare<br/>mut</b> | <b>SSCS:<br/>Rare mut<br/>freq</b> | Avg<br>DCS<br>depth | Total<br>sequenced<br>DCS Nts | <b>DCS:<br/>No. of<br/>rare<br/>mut</b> | <b>DCS: Rare<br/>mut freq</b> |
|---------------------------------|----------------------|--------------------------------|------------------------------------------|------------------------------------|---------------------|-------------------------------|-----------------------------------------|-------------------------------|
| II (Data for Figs 5, 6, S5, S6) | 11622                | 192572847                      | <b>15429</b>                             | <b>8.01 x10<sup>-5</sup></b>       | 2510                | 41582269                      | <b>635</b>                              | <b>1.53 x10<sup>-5</sup></b>  |
| I (Data for Figs S5, S6)        | 11045                | 183007737                      | <b>14881</b>                             | <b>8.13 x10<sup>-5</sup></b>       | 2460                | 40754407                      | <b>571</b>                              | <b>1.40 x10<sup>-5</sup></b>  |

Abbreviations used are: Avg, average; Nts, nucleotides; SSCS, single strand consensus sequences; DCS, duplex consensus sequences; mt, mitochondria; mut, mutation; freq, frequency

**Table S7.** Heat-induced artifactual rare variants identified for the thirteen protein-coding mtDNA genes of human breast normal cells. Variants were counted only once at each position of the genome. The percent variant of each gene was calculated by dividing number of variants observed by the DNA base length of the corresponding gene.

| <b>Protein-coding genes</b> | <b>Gene base length</b> | <b>No. of variants</b> | <b>% variant of each gene</b> |
|-----------------------------|-------------------------|------------------------|-------------------------------|
| MT-ND5                      | 1812                    | 379                    | 20.92                         |
| MT-CO1                      | 1542                    | 299                    | 19.39                         |
| MT-ND4                      | 1378                    | 295                    | 21.41                         |
| MT-CYB                      | 1141                    | 249                    | 21.82                         |
| MT-ND2                      | 1042                    | 209                    | 20.06                         |
| MT-ND1                      | 956                     | 168                    | 17.57                         |
| MT-CO3                      | 784                     | 178                    | 22.70                         |
| <b>MT-CO2</b>               | 684                     | 160                    | <b>23.39</b>                  |
| MT-ATP6                     | 681                     | 129                    | 18.94                         |
| MT-ND6                      | 525                     | 106                    | 20.19                         |
| <b>MT-ND3</b>               | 346                     | 45                     | <b>13.01</b>                  |
| MT-ND4L                     | 297                     | 66                     | 22.22                         |
| MT-ATP8                     | 207                     | 45                     | 21.74                         |

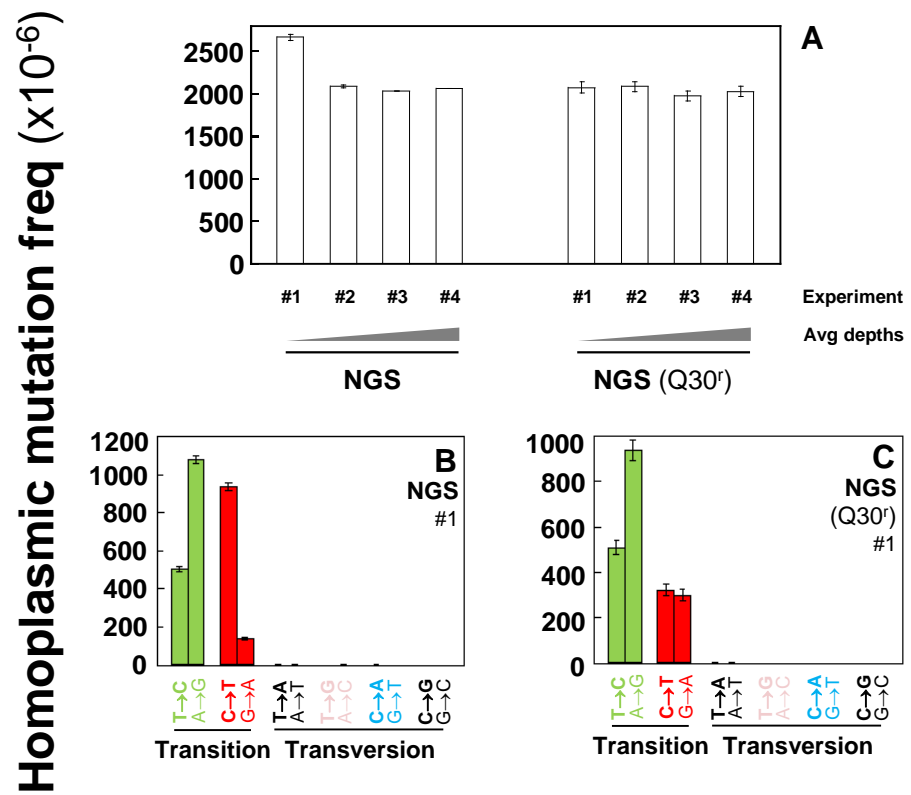

**Figure S1.** Frequencies of homoplasmic point mutations in the whole mtDNA of immortalized human breast cells. Error bars represent the Wilson score 95% confidence intervals. **(A)** Overall frequencies determined by performing conventional NGS before and after (Q30<sup>r</sup>) bioinformatical modifications. The modifications include an increased base quality score of 30 (Q30) from the default score of 13 (Q13) and removal of PCR duplicates. Homoplasmic mutation frequency of specific mutation types determined using conventional NGS analysis before **(B)** and after **(C)** bioinformatical modifications.

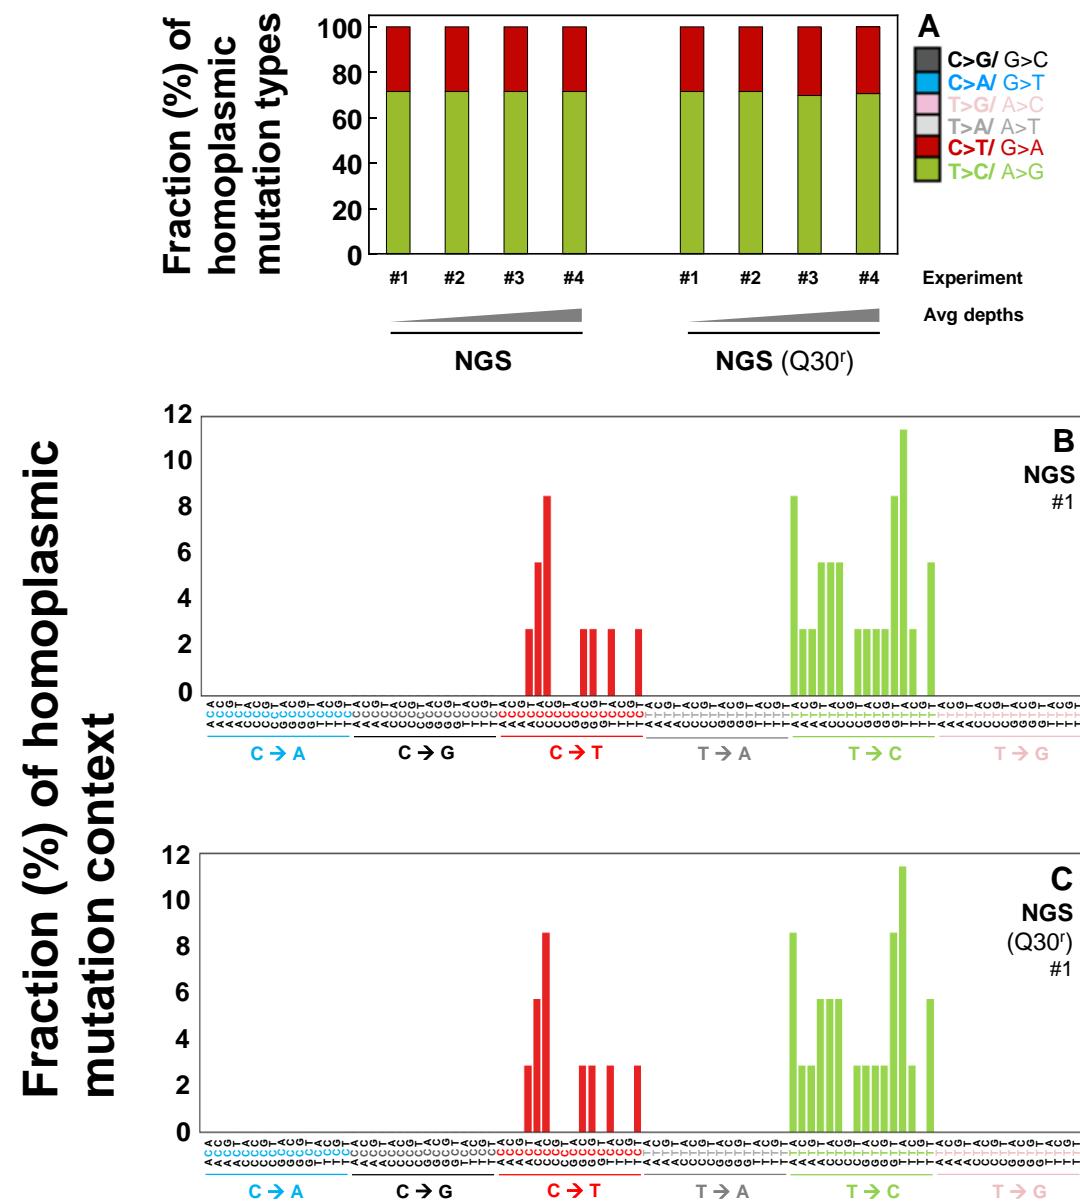

**Figure S2.** Fractions (%) of homoplasmic point mutation types and context spectra in the whole mtDNA of immortalized human breast cells. Relative percentages of mutation types (**A**) and fractions of rare mutation context spectra (**B,C**) were determined by performing conventional NGS analysis before and after (Q30<sup>r</sup>) bioinformatical modifications. The modifications include an increased base quality score of 30 (Q30) from the default score of 13 (Q13) and removal of PCR duplicates.



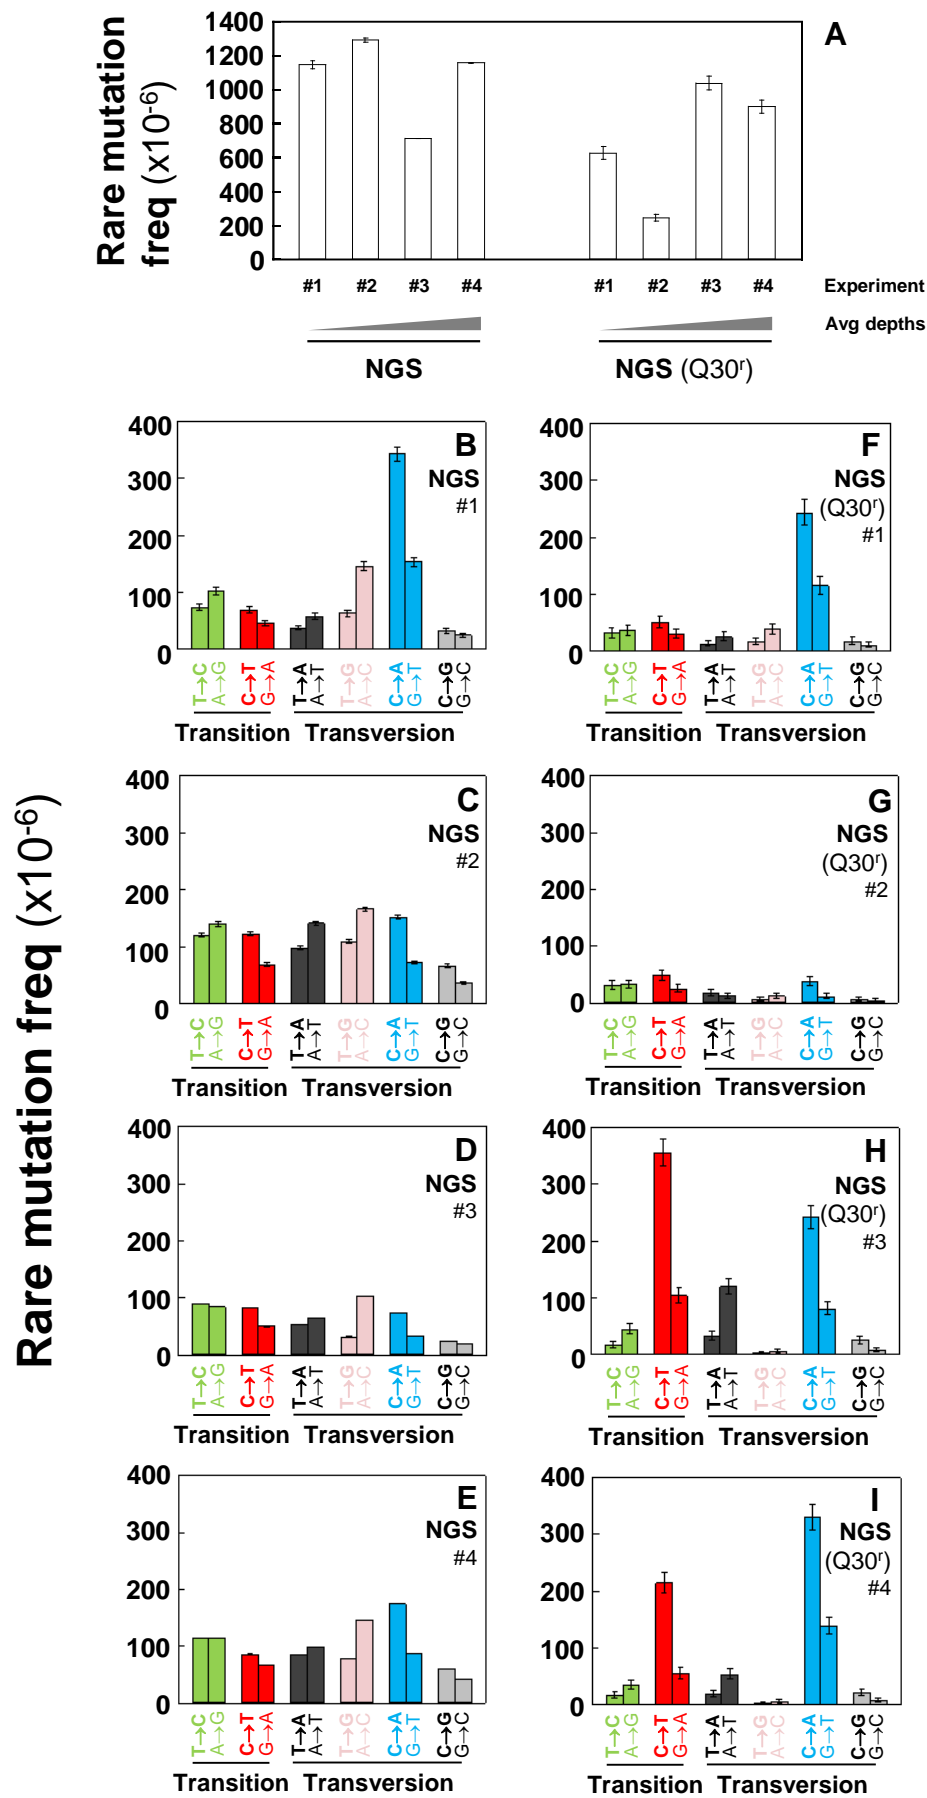

**Figure S3.** Frequencies of rare point mutations in the whole mtDNA of immortalized human breast cells. Error bars represent the Wilson score 95% confidence intervals. **(A)** Overall frequencies determined by performing conventional NGS analysis before and after (Q30<sup>r</sup>) bioinformatical modifications. The modifications include an increased base quality score of 30 (Q30) from the default score of 13 (Q13) and removal of PCR duplicates. Rare mutation frequency of each mutation type **(B-I)** as determined using conventional NGS analysis before and after (Q30<sup>r</sup>) bioinformatical modifications.

Fraction (%) of rare mutation context

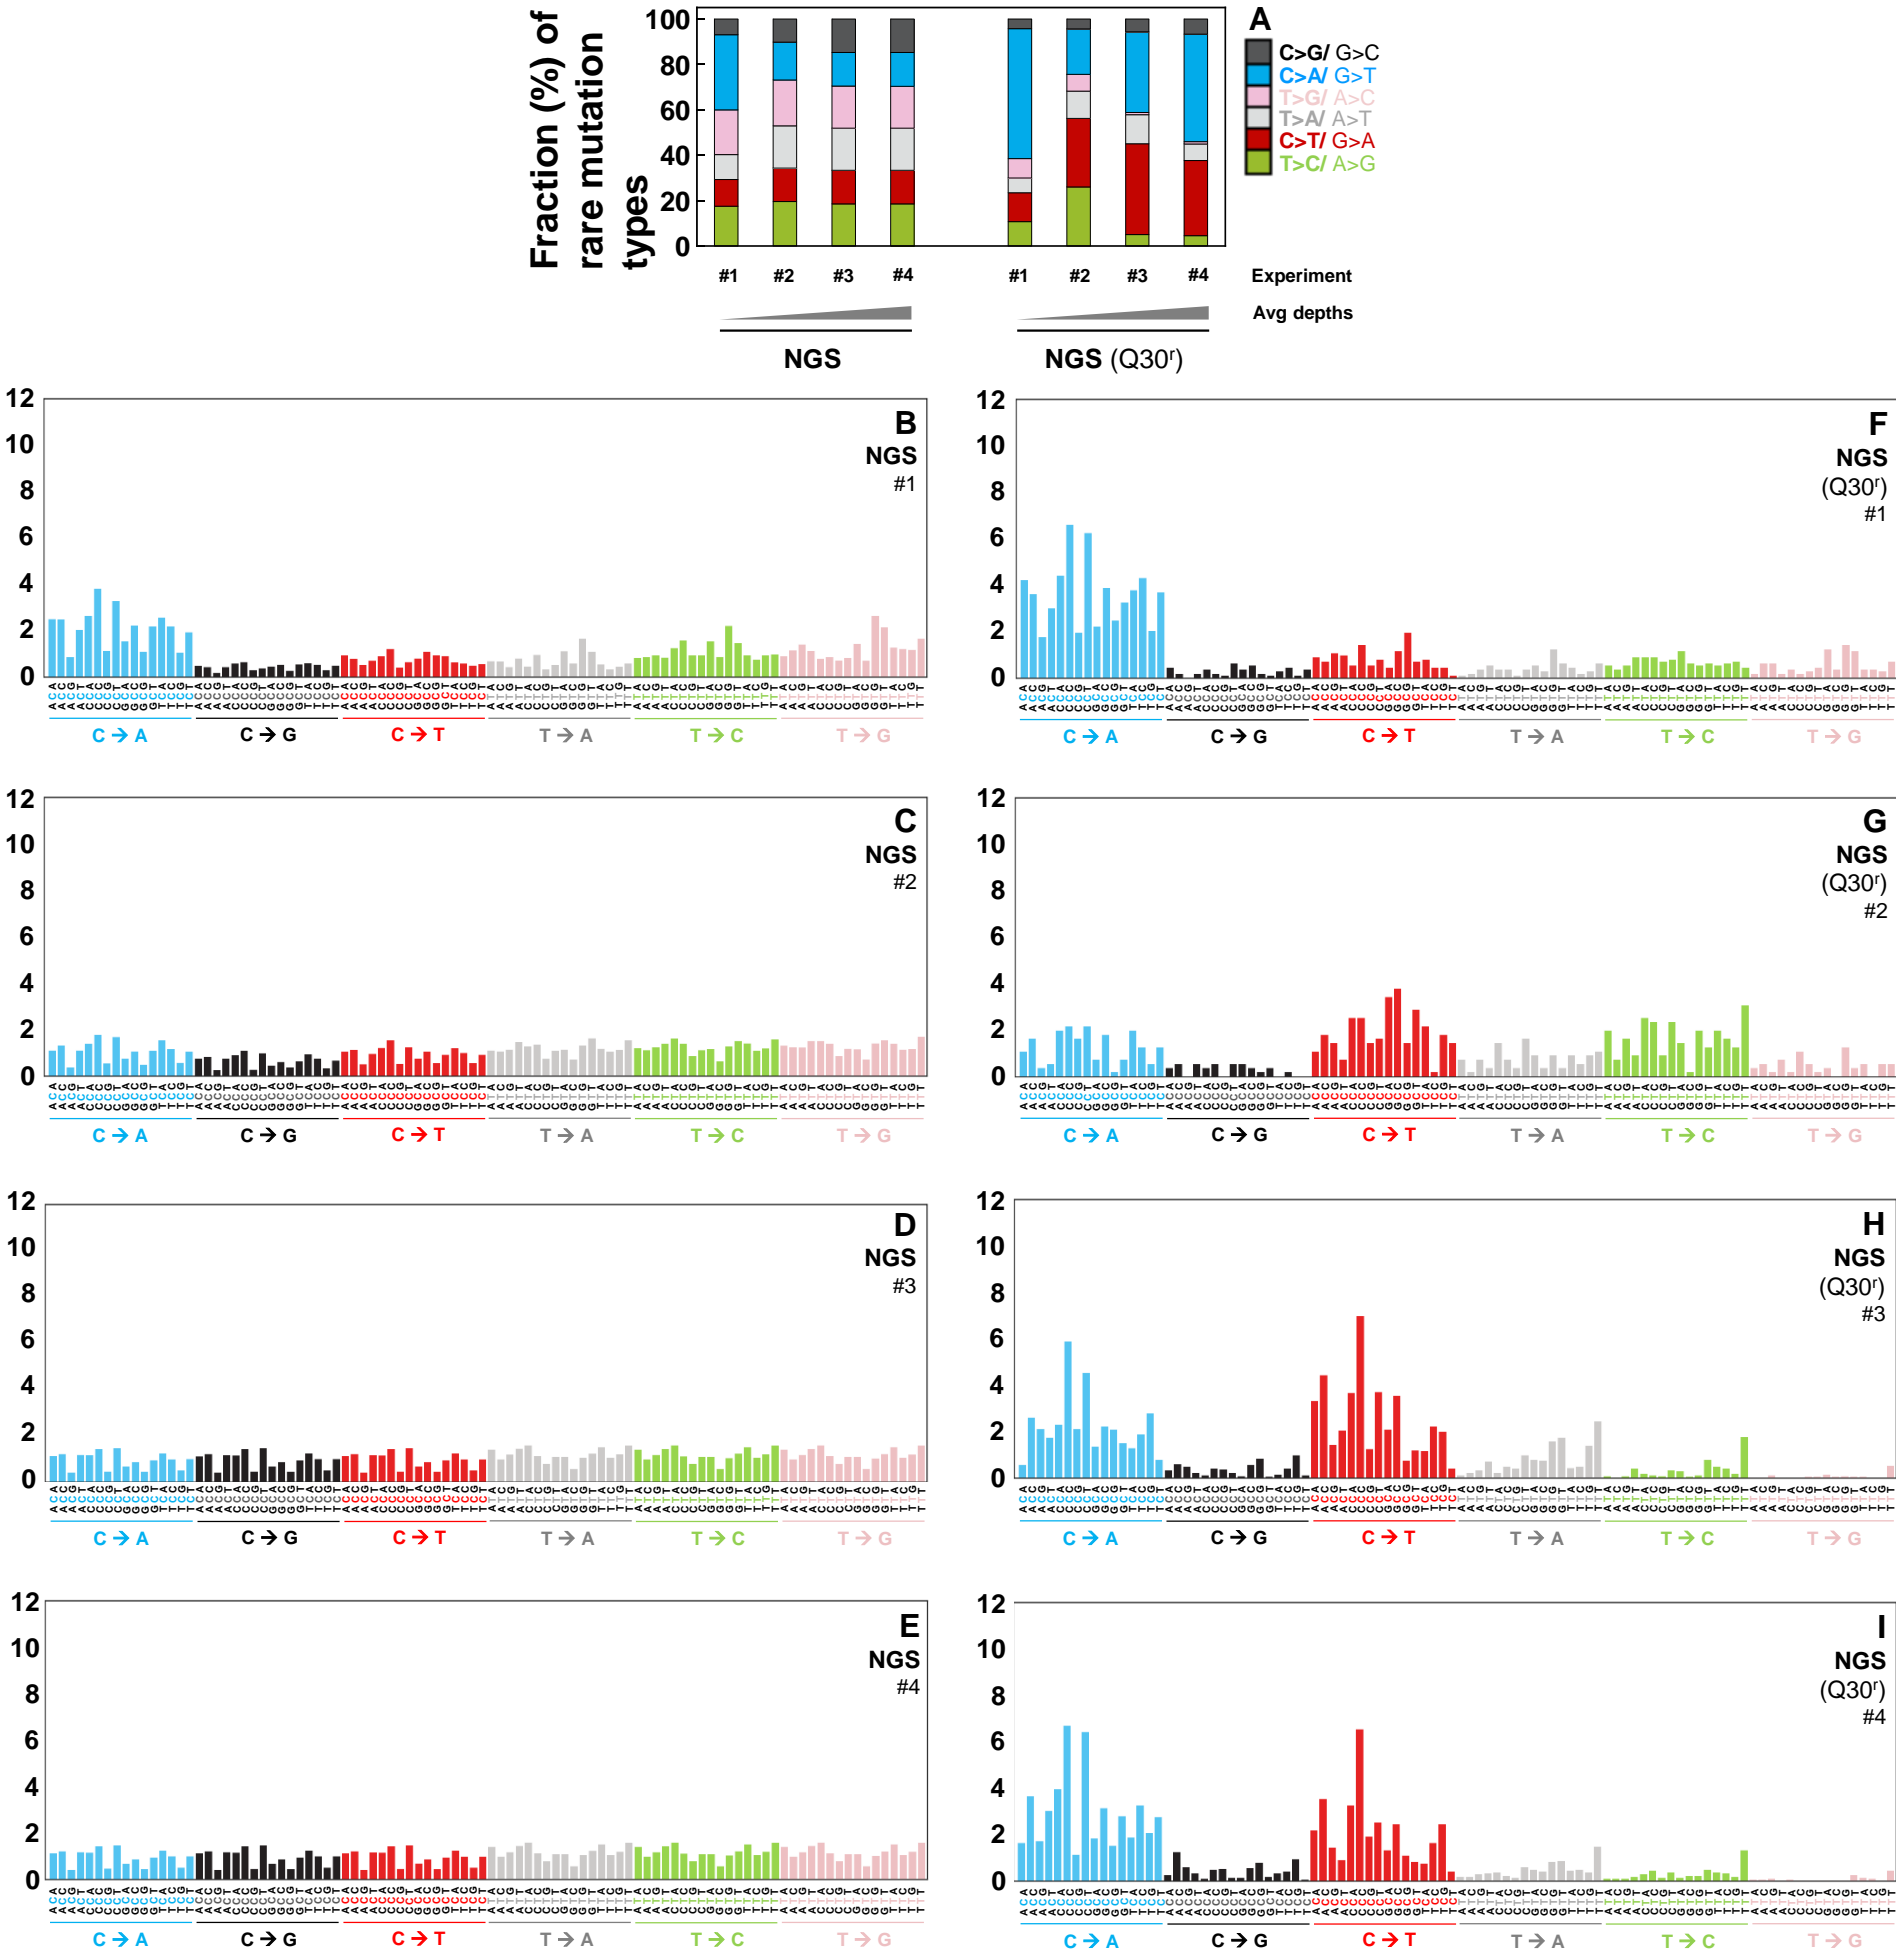

**Figure S4.** Fractions (%) of rare mutation types and context spectra in the whole mtDNA of immortalized human breast cells. Relative percentages of mutation types (**A**) and fractions of rare mutation context spectra (**B-I**) were determined by performing conventional NGS analysis before and after (Q30') bioinformatical modifications. The modifications include an increased base quality score of 30 (Q30) from the default score of 13 (Q13) and removal of PCR duplicates.

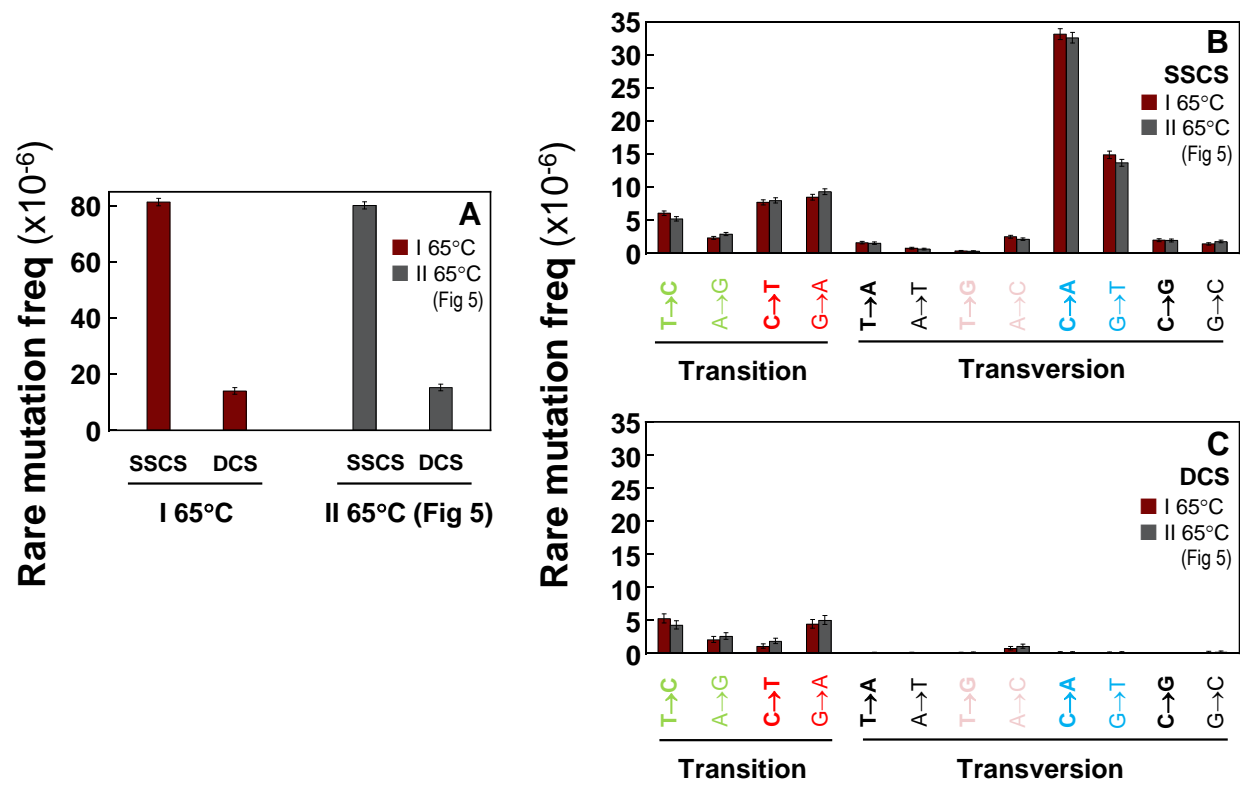

**Figure S5.** Frequencies of the heat-induced (65°C) artifactual rare variants in normal human breast cells I and II derived from breast tissue of the same woman. Data were generated by conducting two independent DNA library experiments (I and II). The purified DNA were heated at 65°C as described for Fig 5 and Fig 6. Overall rare mutation frequency (**A**) and frequencies of rare mutation types (**B,C**) for experiments I and II were determined by SSCS and DCS analyses. Error bars represent the Wilson score 95% confidence intervals.

# Fraction (%) of rare mutation context

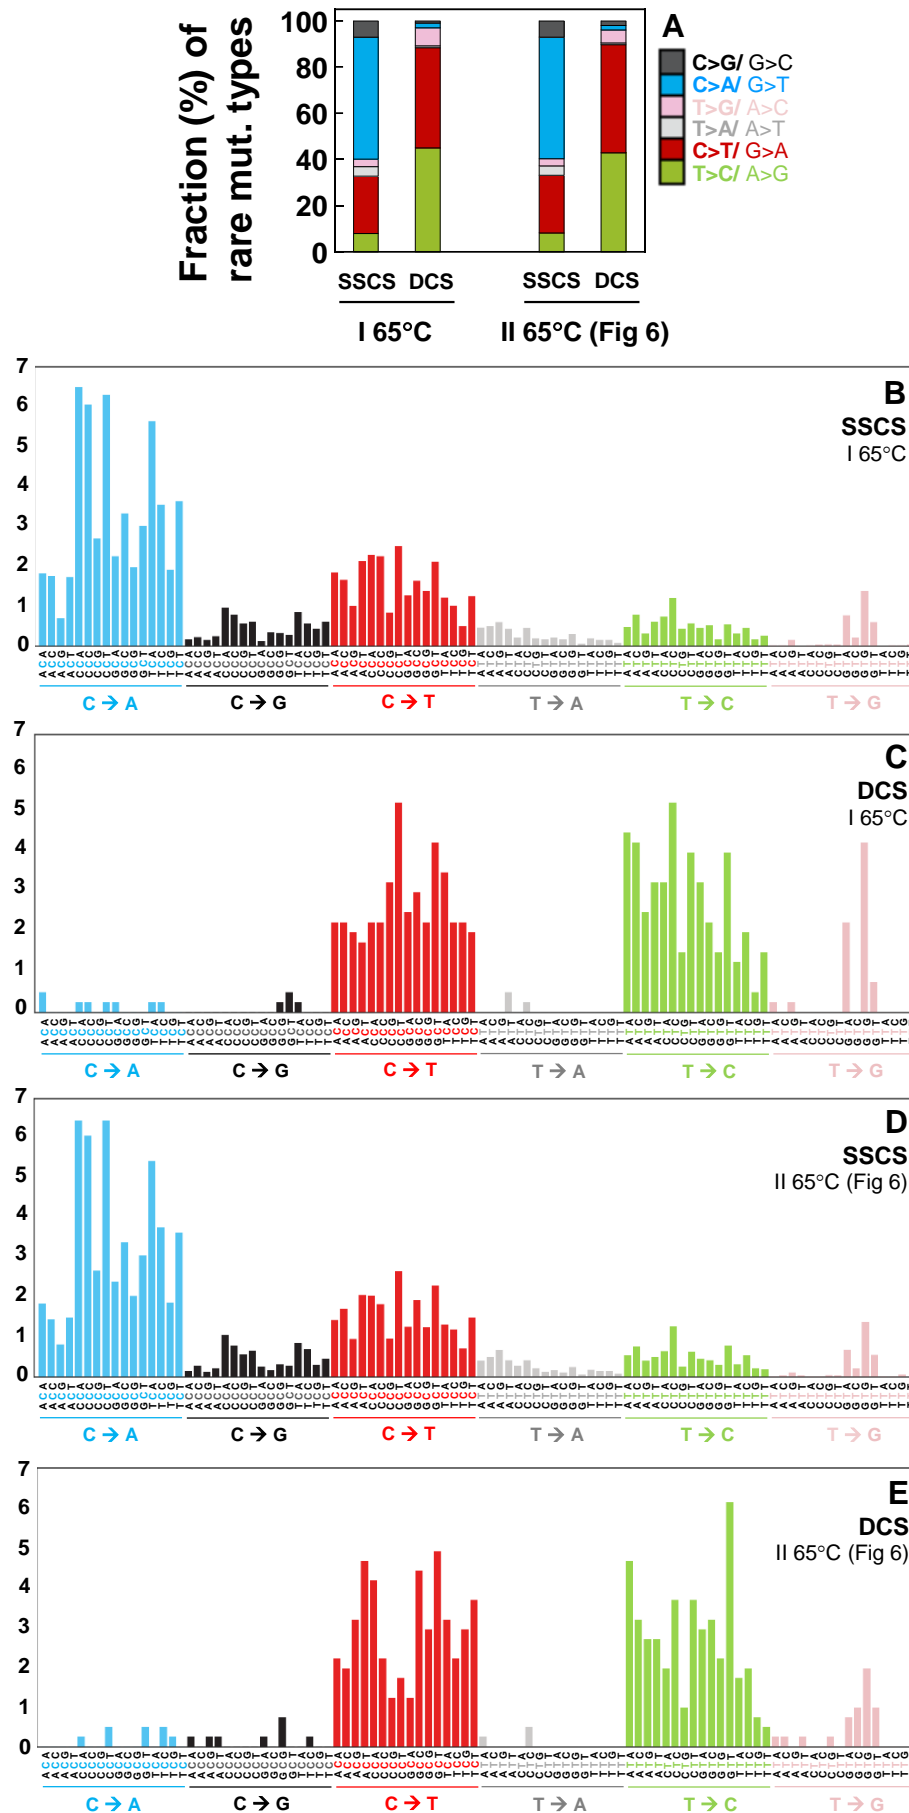

**Figure S6.** Fractions (%) of the heat-induced (65°C) artifactual rare mutation types and context spectra in normal human breast cells I and II derived from breast tissue of the same woman. Data were generated by conducting two independent DNA library experiments (I and II). The purified DNA was heated at 65°C as described for Fig 5 and Fig 6. Relative percentages of rare mutation types (**A**) and rare mutation context spectra (**B-E**) for experiments I and II were determined by SSCS and DCS analyses.
